# Supplementary material for: Spike Formation Is a Turning Point Determining Wheat Root Microbiome Abundance, Structures and Functions
Source: MDPI journal article supplement (doi:10.3390/ijms222111948), 2021-11-04

## Additional file 1

**Supplemental Table S1.** Primers used for quantitative PCR.

| Primer name | Primer sequence (5'→3')     | Amplicon size (bp) | Master mix used for qPCR | Thermal profile of qPCR                                                        | Reference |
|-------------|-----------------------------|--------------------|--------------------------|--------------------------------------------------------------------------------|-----------|
| nosZ-1826Fm | GSC AGR TSK KSA AGT GGA A   | 186                | Power SYBR MasterMix     | 95°C for 10 min, 40 cycles at 95°C for 15 s, 62°C for 1 m, 95°C for 10s (+0.3) | [1]       |
| nosZ-2012R  | CGG TCC TTS GAG AAC TT      |                    |                          |                                                                                |           |
| 16S-331F    | TCC TAC GGG AGG CAG CAG T   | 195                | FAST SYBR MasterMix      | 95°C for 5 min, 40 cycles at 95°C for 5 s, 60°C for 30 s, 95°C for 10s (+0.3)  | [2, 3]    |
| 16S-518R    | ATT ACC GCG GCT GCTG G      |                    |                          |                                                                                |           |
| TEF_F       | ACT GTG CAG TAG TAC TTG GTG | 155                | FAST SYBR MasterMix      | 95°C for 5 min, 40 cycles at 95°C for 5 s, 60°C for 30 s, 95°C for 10s (+0.3)  | [4]       |
| TEF_R       | AAG CTA GGA GGT ATT GAC AAG |                    |                          |                                                                                |           |

1. Usyskin-Tonne A, Hadar Y, Yermiyahu U, Minz D. Elevated CO<sub>2</sub> has a significant impact on denitrifying bacterial community in wheat roots. *Soil Biol Biochem* 2020; **142**: 107697.
2. Hunter N, Nadkarni MA, Jacques NA, Martin FE. Determination of bacterial load by real-time PCR using a broad-range (universal) probe and primers set. *Microbiology* 2002; **148**: 257–266.
3. Lopez I, Ruiz-Larrea F, Cocolin L, Orr E, Phister T, Marshall M, et al. Design and evaluation of PCR primers for analysis of bacterial populations in wine by denaturing gradient gel electrophoresis. *Appl Environ Microbiol* 2003; **69**: 6801–6807.
4. Ruppel S, Rühlmann J, Merbach W. Quantification and localization of bacteria in plant tissues using quantitative real-time PCR and online emission fingerprinting. *Plant Soil* 2006; **286**: 21–35.

**Supplemental Table S2.** Root-associated and rhizosphere contigs divided into catalogues

| Niche       | Catalogue name | Number of contigs | N50 (bp) |
|-------------|----------------|-------------------|----------|
| Roots       | week 1         | 233,475           | 700      |
|             | week 2         | 295,394           | 780      |
|             | week 5         | 349,966           | 691      |
|             | week 9         | 265,158           | 702      |
|             | week 12        | 439,827           | 736      |
|             | week 17a       | 371,640           | 759      |
|             | week 17b       | 567,046           | 680      |
| Rhizosphere | week 1         | 470,984           | 701      |
|             | week 2         | 485,480           | 706      |
|             | week 5         | 557,525           | 726      |
|             | week 9         | 458,671           | 722      |
|             | week 12a       | 266,674           | 694      |
|             | week 12b       | 294,897           | 692      |
|             | week 17a       | 274,544           | 689      |
|             | week 17b       | 264,367           | 685      |

**Supplemental Table S3.** List of normalized gene counts per cell for *Proteobacteria*, *Actinobacteria* and *Bacteroidetes*

| Bacteria phyla | Function group                       | Function group type | Relative abundance (%) | Number of genes before spike formation | Number of genes after spike formation | Functional genes significantly abundant before or after spike formation | Number of genes per cell |
|----------------|--------------------------------------|---------------------|------------------------|----------------------------------------|---------------------------------------|-------------------------------------------------------------------------|--------------------------|
| Actinobacteria | Amino acid                           | ABC transporters    | 27                     | 809                                    | 715                                   | before                                                                  | 30                       |
| Actinobacteria | Amino acid                           | ABC transporters    | 37                     | 7381                                   | 12003                                 | after                                                                   | 325                      |
| Actinobacteria | Amino acid                           | Biosynthesis        | 27                     | 3                                      | 3                                     | before                                                                  | 0                        |
| Actinobacteria | Amino acid                           | Biosynthesis        | 37                     | 5457                                   | 9522                                  | after                                                                   | 258                      |
| Actinobacteria | Amino acid                           | Degradation         | 27                     | 1532                                   | 2327                                  | before                                                                  | 57                       |
| Actinobacteria | Amino acid                           | Metabolism          | 27                     | 18848                                  | 28884                                 | before                                                                  | 702                      |
| Actinobacteria | Amino acid                           | Metabolism          | 37                     | 3400                                   | 5278                                  | after                                                                   | 143                      |
| Actinobacteria | Antibiotics synthesis and resistance | ABC transporters    | 27                     | 56                                     | 22                                    | before                                                                  | 2                        |
| Actinobacteria | Antibiotics synthesis and resistance | ABC transporters    | 37                     | 1068                                   | 1848                                  | after                                                                   | 50                       |
| Actinobacteria | Antibiotics synthesis and resistance | Biosynthesis        | 37                     | 10672                                  | 19366                                 | after                                                                   | 524                      |
| Actinobacteria | Antibiotics synthesis and resistance | Resistance          | 27                     | 4063                                   | 6187                                  | before                                                                  | 151                      |
| Actinobacteria | Antibiotics synthesis and resistance | Resistance          | 27                     | 279                                    | 557                                   | before                                                                  | 10                       |
| Actinobacteria | Antibiotics synthesis and resistance | Transporters        | 27                     | 133                                    | 236                                   | before                                                                  | 5                        |
| Actinobacteria | Chemotaxis                           |                     | 27                     | 3332                                   | 6834                                  | before                                                                  | 124                      |
| Actinobacteria | Quorum sensing                       |                     | 27                     | 16740                                  | 24655                                 | before                                                                  | 624                      |
| Actinobacteria | Secretion system                     |                     | 27                     | 2142                                   | 3301                                  | before                                                                  | 80                       |
| Actinobacteria | Biofilm formation                    |                     | 27                     | 7643                                   | 12537                                 | before                                                                  | 285                      |
| Actinobacteria | Carbon                               | ABC transporters    | 27                     | 828                                    | 1429                                  | before                                                                  | 31                       |
| Actinobacteria | Carbon                               | ABC transporters    | 37                     | 27467                                  | 46799                                 | after                                                                   | 1267                     |
| Actinobacteria | Carbon                               | Biosynthesis        | 27                     | 5617                                   | 6387                                  | before                                                                  | 209                      |
| Actinobacteria | Carbon                               | Biosynthesis        | 37                     | 6121                                   | 9364                                  | after                                                                   | 253                      |
| Actinobacteria | Carbon                               | Degradation         | 37                     | 10924                                  | 17979                                 | after                                                                   | 487                      |
| Actinobacteria | Carbon                               | Metabolism          | 27                     | 2854                                   | 4229                                  | before                                                                  | 106                      |
| Actinobacteria | Carbon                               | Metabolism          | 37                     | 42138                                  | 73426                                 | after                                                                   | 1988                     |
| Actinobacteria | Carbon                               | Transporters        | 27                     | 42                                     | 16                                    | before                                                                  | 2                        |
| Actinobacteria | Ion                                  | ABC transporters    | 27                     | 8                                      | 8                                     | before                                                                  | 0                        |
| Actinobacteria | Ion                                  | Transporters        | 27                     | 44                                     | 28                                    | before                                                                  | 2                        |
| Actinobacteria | Metal                                | ABC transporters    | 27                     | 2561                                   | 4684                                  | before                                                                  | 95                       |
| Actinobacteria | Metal                                | ABC transporters    | 37                     | 325                                    | 621                                   | after                                                                   | 17                       |
| Actinobacteria | Nitrogen                             | Denitrification     | 27                     | 501                                    | 780                                   | before                                                                  | 19                       |
| Bacteroidetes  | Amino acid                           | ABC transporters    | 5                      | 29                                     | 17                                    | before                                                                  | 6                        |
| Bacteroidetes  | Amino acid                           | ABC transporters    | 5                      | 8                                      | 34                                    | after                                                                   | 6                        |
| Bacteroidetes  | Amino acid                           | Biosynthesis        | 5                      | 416                                    | 695                                   | after                                                                   | 132                      |
| Bacteroidetes  | Amino acid                           | Degradation         | 5                      | 128                                    | 156                                   | before                                                                  | 24                       |
| Bacteroidetes  | Amino acid                           | Metabolism          | 5                      | 5114                                   | 6912                                  | before                                                                  | 975                      |
| Bacteroidetes  | Amino acid                           | Metabolism          | 5                      | 491                                    | 604                                   | after                                                                   | 115                      |
| Bacteroidetes  | Antibiotics synthesis and resistance | ABC transporters    | 5                      | 7                                      | 5                                     | before                                                                  | 1                        |
| Bacteroidetes  | Antibiotics synthesis and resistance | ABC transporters    | 5                      | 37                                     | 59                                    | after                                                                   | 11                       |
| Bacteroidetes  | Antibiotics synthesis and resistance | Biosynthesis        | 5                      | 1001                                   | 1298                                  | after                                                                   | 247                      |
| Bacteroidetes  | Antibiotics synthesis and resistance | Resistance          | 5                      | 2264                                   | 2751                                  | before                                                                  | 453                      |
| Bacteroidetes  | Antibiotics synthesis and resistance | Transporters        | 5                      | 251                                    | 284                                   | before                                                                  | 48                       |
| Bacteroidetes  | Chemotaxis                           |                     | 5                      | 254                                    | 480                                   | before                                                                  | 48                       |
| Bacteroidetes  | Quorum sensing                       |                     | 5                      | 1314                                   | 1721                                  | before                                                                  | 251                      |
| Bacteroidetes  | Secretion system                     |                     | 5                      | 74                                     | 47                                    | before                                                                  | 14                       |
| Bacteroidetes  | Biofilm formation                    |                     | 5                      | 545                                    | 793                                   | before                                                                  | 104                      |
| Bacteroidetes  | Carbon                               | ABC transporters    | 5                      | 780                                    | 1003                                  | before                                                                  | 149                      |
| Bacteroidetes  | Carbon                               | ABC transporters    | 5                      | 17                                     | 20                                    | after                                                                   | 4                        |
| Bacteroidetes  | Carbon                               | Biosynthesis        | 5                      | 1760                                   | 1786                                  | before                                                                  | 335                      |
| Bacteroidetes  | Carbon                               | Biosynthesis        | 5                      | 822                                    | 1317                                  | after                                                                   | 251                      |
| Bacteroidetes  | Carbon                               | Degradation         | 5                      | 4939                                   | 7264                                  | after                                                                   | 1382                     |
| Bacteroidetes  | Carbon                               | Metabolism          | 5                      | 18                                     | 20                                    | before                                                                  | 3                        |
| Bacteroidetes  | Carbon                               | Metabolism          | 5                      | 8230                                   | 11833                                 | after                                                                   | 2251                     |
| Bacteroidetes  | Ion                                  | ABC transporters    | 5                      | 78                                     | 51                                    | before                                                                  | 15                       |
| Bacteroidetes  | Ion                                  | Transporters        | 5                      | 94                                     | 123                                   | before                                                                  | 18                       |
| Bacteroidetes  | Ion                                  | Transporters        | 5                      | 5                                      | 2                                     | before                                                                  | 1                        |
| Bacteroidetes  | Metal                                | ABC transporters    | 5                      | 73                                     | 62                                    | before                                                                  | 14                       |
| Bacteroidetes  | Nitrogen                             | Denitrification     | 5                      | 41                                     | 25                                    | before                                                                  | 8                        |
| Proteobacteria | Amino acid                           | ABC transporters    | 62                     | 27986                                  | 23593                                 | before                                                                  | 450                      |
| Proteobacteria | Amino acid                           | ABC transporters    | 52                     | 4231                                   | 4492                                  | after                                                                   | 87                       |
| Proteobacteria | Amino acid                           | Biosynthesis        | 62                     | 7                                      | 17                                    | before                                                                  | 0                        |
| Proteobacteria | Amino acid                           | Biosynthesis        | 52                     | 3341                                   | 4203                                  | after                                                                   | 82                       |
| Proteobacteria | Amino acid                           | Degradation         | 62                     | 7584                                   | 6383                                  | before                                                                  | 122                      |
| Proteobacteria | Amino acid                           | Metabolism          | 62                     | 78019                                  | 70650                                 | before                                                                  | 1253                     |
| Proteobacteria | Amino acid                           | Metabolism          | 52                     | 6463                                   | 7226                                  | after                                                                   | 140                      |
| Proteobacteria | Antibiotics synthesis and resistance | ABC transporters    | 62                     | 11196                                  | 9291                                  | before                                                                  | 180                      |
| Proteobacteria | Antibiotics synthesis and resistance | ABC transporters    | 52                     | 51                                     | 46                                    | after                                                                   | 1                        |
| Proteobacteria | Antibiotics synthesis and resistance | Biosynthesis        | 52                     | 6975                                   | 6541                                  | after                                                                   | 127                      |
| Proteobacteria | Antibiotics synthesis and resistance | Resistance          | 62                     | 36956                                  | 36280                                 | before                                                                  | 594                      |
| Proteobacteria | Antibiotics synthesis and resistance | Resistance          | 62                     | 17899                                  | 15325                                 | before                                                                  | 289                      |
| Proteobacteria | Antibiotics synthesis and resistance | Transporters        | 62                     | 36841                                  | 30887                                 | before                                                                  | 592                      |
| Proteobacteria | Chemotaxis                           |                     | 62                     | 47886                                  | 39568                                 | before                                                                  | 769                      |
| Proteobacteria | Quorum sensing                       |                     | 62                     | 53297                                  | 52493                                 | before                                                                  | 856                      |
| Proteobacteria | Secretion system                     |                     | 62                     | 86817                                  | 67617                                 | before                                                                  | 1395                     |
| Proteobacteria | Biofilm formation                    |                     | 62                     | 41563                                  | 37687                                 | before                                                                  | 668                      |
| Proteobacteria | Carbon                               | ABC transporters    | 62                     | 30072                                  | 25734                                 | before                                                                  | 483                      |
| Proteobacteria | Carbon                               | ABC transporters    | 52                     | 9950                                   | 10446                                 | after                                                                   | 203                      |
| Proteobacteria | Carbon                               | Biosynthesis        | 62                     | 15081                                  | 13209                                 | before                                                                  | 242                      |
| Proteobacteria | Carbon                               | Biosynthesis        | 52                     | 12626                                  | 13861                                 | after                                                                   | 269                      |
| Proteobacteria | Carbon                               | Degradation         | 52                     | 7271                                   | 8049                                  | after                                                                   | 156                      |
| Proteobacteria | Carbon                               | Metabolism          | 62                     | 13902                                  | 12629                                 | before                                                                  | 223                      |
| Proteobacteria | Carbon                               | Metabolism          | 52                     | 55133                                  | 53344                                 | after                                                                   | 1035                     |
| Proteobacteria | Carbon                               | Transporters        | 62                     | 2101                                   | 1498                                  | before                                                                  | 34                       |
| Proteobacteria | Ion                                  | ABC transporters    | 62                     | 4067                                   | 3169                                  | before                                                                  | 65                       |
| Proteobacteria | Ion                                  | Transporters        | 62                     | 290                                    | 89                                    | before                                                                  | 5                        |
| Proteobacteria | Ion                                  | Transporters        | 62                     | 8365                                   | 6147                                  | before                                                                  | 134                      |
| Proteobacteria | Metal                                | ABC transporters    | 62                     | 25229                                  | 22403                                 | before                                                                  | 405                      |
| Proteobacteria | Nitrogen                             | Denitrification     | 62                     | 7715                                   | 5879                                  | before                                                                  | 124                      |

**Supplemental Figure S1.** Weather conditions during wheat growth

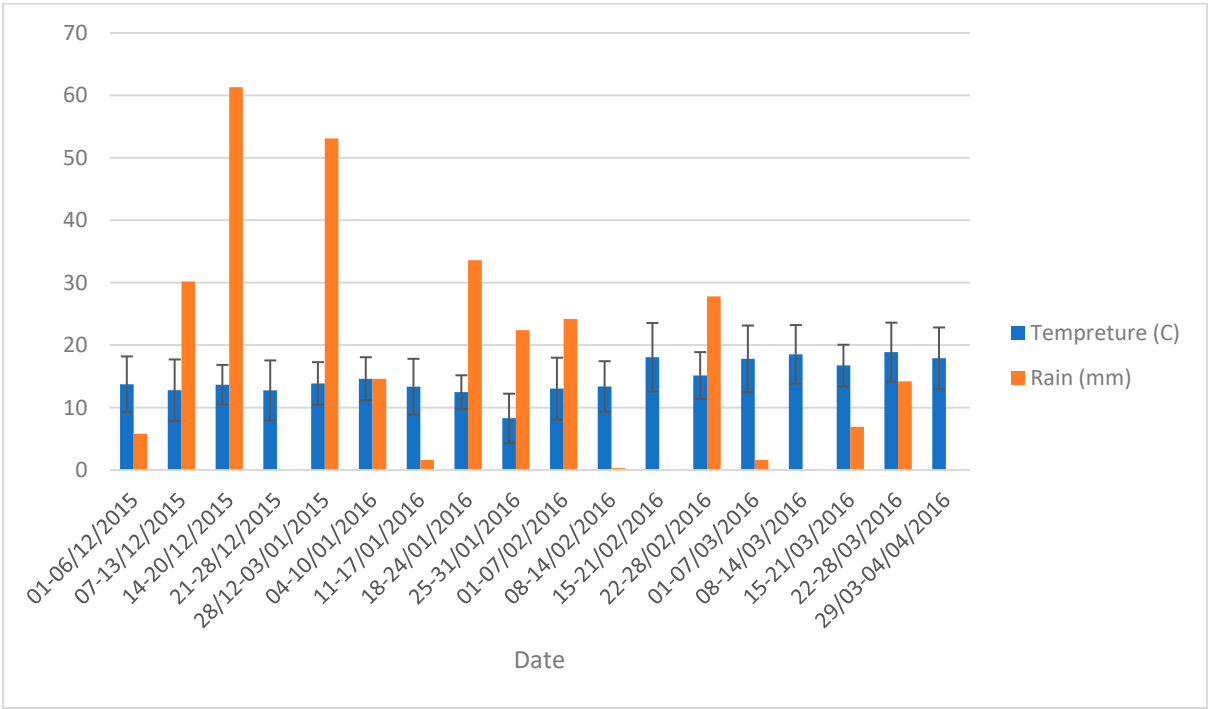

Error bars indicate average temperature during a day (maximum) and average temperature during a night (minimum).

**Supplemental Figure S2.** Green (A) and yellow (B) spikes at the final stages of wheat growth (17 week)

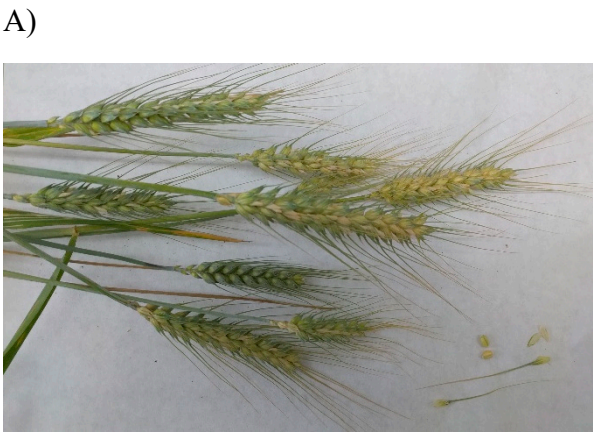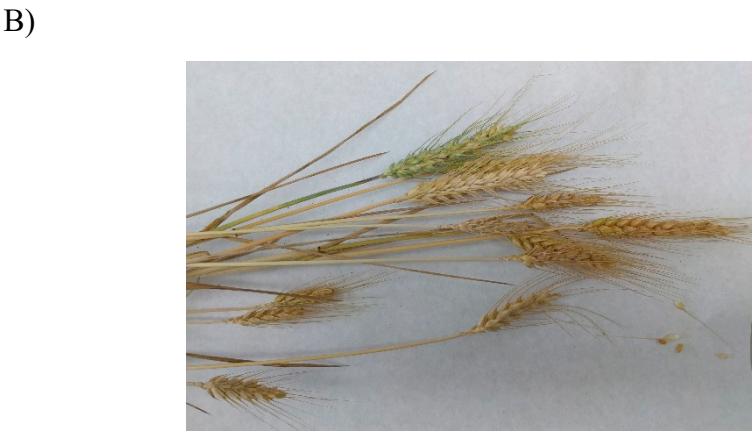

Supplement: s1 [file s1]
